# Supplementary material
Source: publisher site journal article supplement (https://www.dovepress.com/article/474628)
Supplement: Supplementary file 1 [file get_supplementary_file.php]

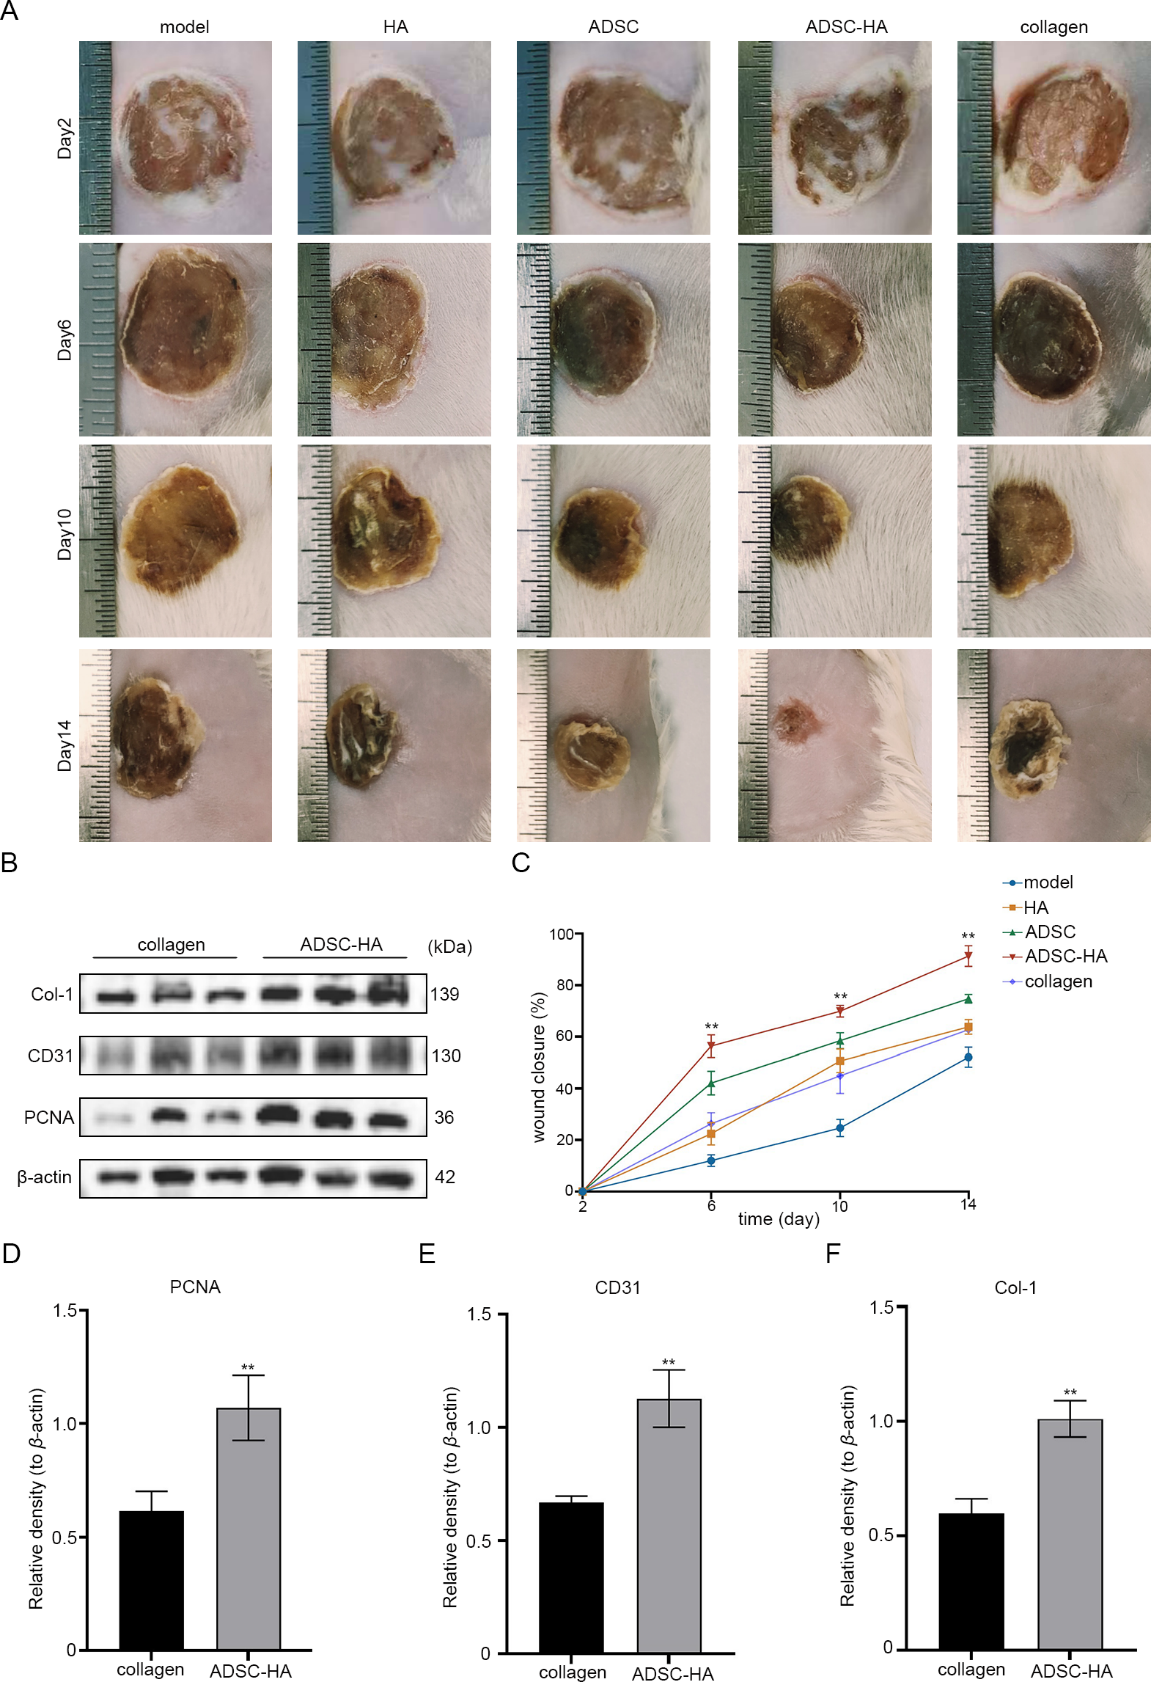


SFigure 1. The effects of hADSCs-HA gel on pressure ulcers in vivo with a positive control group added. (A) Representative images of dorsal skin wounds in mice recorded at 2, 6, 10, and 14 days after topical applications of saline (model), hyaluronic acid (HA), hADSCs (ADSC), hADSCs-HA gel (ADSC-HA) or collagen gel (collagen). (B) The results of Western blot of Col-1, CD31, and PCNA on day 14 and quantification of protein expression. (C) Quantification of the wound closure rate according to the formula: wound closure rate (%) = (A0 - At) / (A0) × 100%. A0 was the original wound area and At was the wound area at the indicated times. (D-F) Quantification of protein expression of PCNA, CD31, and Col-1. Data are shown as mean ± SD (n = 3); *p < 0.05 vs. model, **p < 0.01 vs. model; #p < 0.05 vs. ADSC-HA, ##p < 0.01 vs. ADSC-HA.
